# Supplementary material for: Identification and Quantification of Anthocyanin and Catechin Compounds in Purple Tea Leaves and Flakes
Source: MDPI journal article supplement (doi:10.3390/molecules27196676), 2022-10-07
Supplement: s1 [file s1]

**Supplementary Table S1**

Minor anthocyanin pigments detected in purple tea

| RT<br>(min) | Identity of anthocyanin | Major ions ( <i>m/z</i> ) |                    |
|-------------|-------------------------|---------------------------|--------------------|
|             |                         | Anthocyanin               | Anthocyanidin base |
| 8.1         | Pt-Hex                  | 479.1167                  | 317.0648           |
| 8.5         | Pl-Hex                  | 433.1124                  | 271.0598           |
| 8.7         | Pt-Hex                  | 479.1167                  | 317.0648           |
| 14.6        | Cy-Cou-Hex              | 595.1439                  | 287.0544           |
| 15.1        | Pt-Cou-Hex              | 625.1547                  | 317.0648           |
| 15.9        | Pl-Cou-Hex              | 579.1491                  | 271.0592           |
| 17.5        | Pl-Cou-Hex              | 579.1491                  | 271.0592           |
| 17.9        | Pt-Cou-Hex              | 625.1547                  | 317.0649           |
| 19.3        | Pl-Cou-Hex              | 579.1491                  | 271.0592           |

<sup>y</sup>Cou, coumaroyl; Cy, cyanidin; Hex, Hexoside; Pl-Pelargonidin; Pt, petunidin.

## Supplementary Figure S1

MS fragmentation spectra of (A) peak 1 (Dp-3-Gal), (B), peak 3 (Cy-3-Gal), (C) peak 7 (Dp-Cou-Hex) and (D) peak 9 (Pt-Cou-Hex).

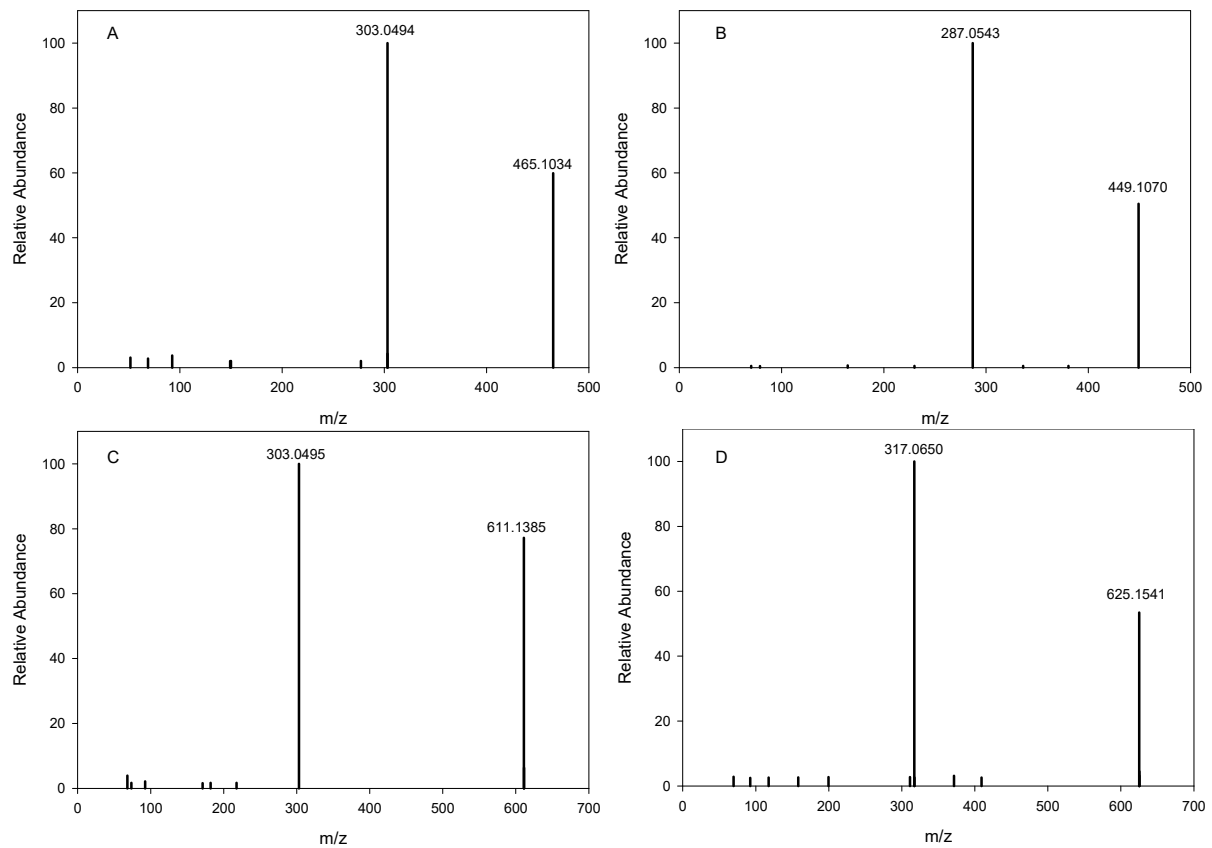

### Supplementary Figure S2

Typical UPLC chromatograms of green tea leaves (A) and flakes (B) showing no anthocyanin peaks.

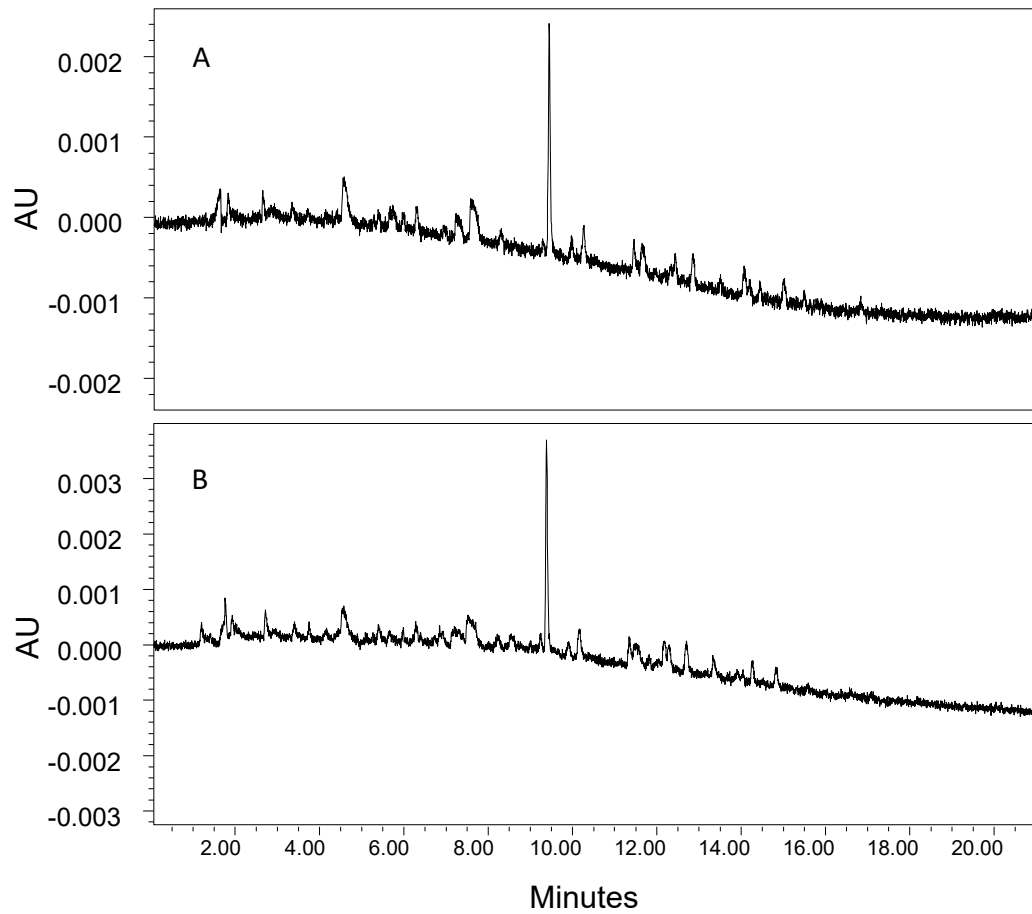

**Supplementary Table S1.** Minor anthocyanin pigments detected in purple tea

**Supplementary Figure S1.** MS fragmentation spectra of (A) peak 1 (Dp-3-Gal), (B), peak 3 (Cy-3-Gal), (C) peak 7 (Dp-Cou-Hex) and (D) peak 9 (Pt-Cou-Hex).

**Supplementary Figure S2.** Typical UPLC chromatograms of green tea leaves (A) and flakes (B) showing no anthocyanin peaks.
